# Supplementary material
Source: PubMed Central journal article supplement (PMC2785973)
Supplement: pp.109.146803_1.pdf [file pp.109.146803_1.pdf]

## Supplemental data

### 1. Supplemental Figures

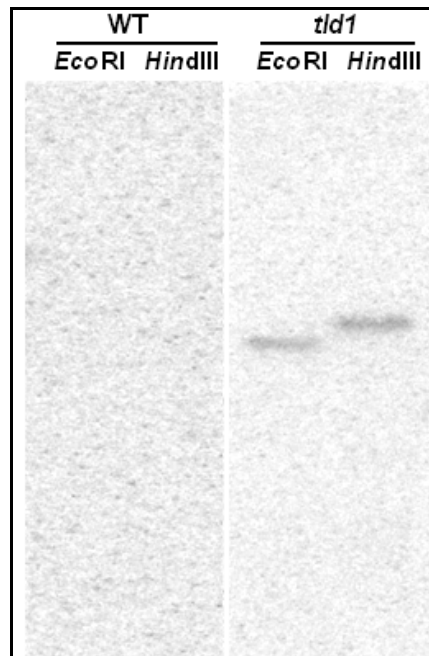

**Supplemental Figure S1 Determination of the number of T-DNA insertions in *tld1-D* by Southern blotting.** Genomic DNA isolated from wild-type (WT) or homozygous *tld1* plants was digested with *EcoRI* or *HindIII*. The blot was probed with  $\alpha$ -<sup>32</sup>P-dCTP-hygromycin coding sequence. A single band was detected in the *tld1* mutant, while no band was detected in WT.

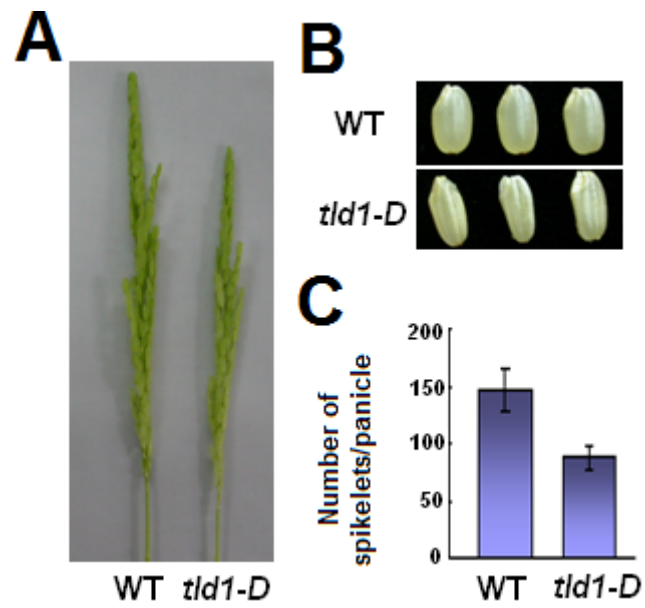

**Supplemental Figure S2 Productivity of WT vs. *tld1-D*.** (A) Representative panicles from WT and *tld1-D* plants. (B) Mature seeds from WT and *tld1-D* plants. (C) The number of spikelets per panicle (n=10).

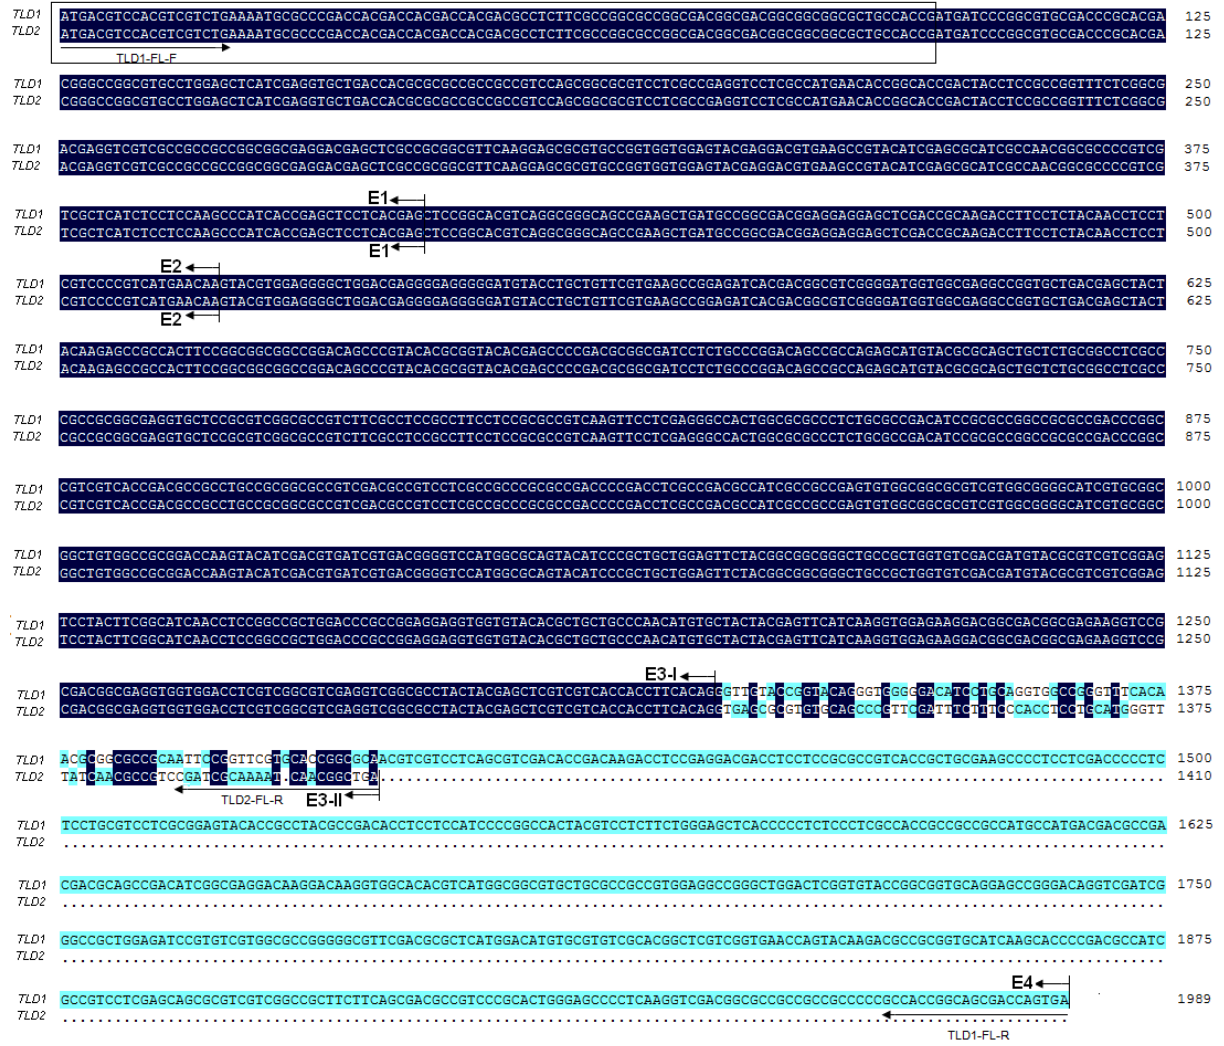

**Supplemental Figure S3 The coding sequences of the *TLD1* and *TLD2* splice variants.** The four exons in *TLD1* are indicated by arrows along the upper edge, while the three exons in *TLD2* are indicated by arrows along the lower edge. The primers used to clone the open reading frames of *TLD1* and *TLD2* are underlined. Similarities are shown in black. The 99 extra base pairs described in the text are boxed.

|          |                                                                                                                                     |     |
|----------|-------------------------------------------------------------------------------------------------------------------------------------|-----|
| AtGH3.3  | .....HTVDSLRSPMMHSPST.KDVKARFIEEIRNVDFVOKKVIRESLHNSDTEYLKRFK.....LNGRTDR..KTRFRTMVFVLDLDRPEHCRILANGDRS                              | 93  |
| AtGH3.6  | .....MPEAPKIAALEVSDSESLAEKKNKQIFEDVITINADVQRVVLEELHLSRNADVVEYLKRHG.....LEGRTDR..ETFKRMVQVITHEIDIGPHNRIANGDRS                        | 95  |
| AtGH3.5  | .....MPEAPKKESEVFDLTDQKNKQKQLEELHLSRNADVQRVVLEELHLSRNADVVEYLKRHD.....LNGRTDR..ETFKRMVQVITHEIDIGPHNRIANGDRS                          | 95  |
| AtGH3.2  | .....MAVDSPLQSRMVSATTSEKDVAKKPFIEEIRNRPDPSVCEKVLGEHLTNSNTTEYLKRFD.....LDGVDDR..KTRFRTMVFVLDLDRPEHCRILANGDRS                         | 94  |
| AtGH3.17 | .....MIPSYDPMNDTEAGKLEEDLITINAEALCQQVLLHOLISQNSGTCLYLRAPL.....DGEADKVKQSFNKKVQVNVNDVVRPFIQRIADGESS                                  | 85  |
| OsGH3.1  | .....MPEAPTAKTAPAYGYAPG.AHAEAELFIEHVITANAGVQRVVLEELHLSRNADVVEYLKRHYG.....IPGSPDVV.DAFRRLVQVITHEIDIGPHNRIANGDRS                      | 95  |
| OsGH3.8  | .....MAVMTDVSTTGTALRTPAAGAVKE.GDVEKRFIEEIRNVDFVOKKVIRESLHNSDTEYLKRFK.....LDGATDR..AAFRKRVVQVITHEIDIGPHNRIANGDRS                     | 100 |
| TLD1     | MTSSTSENAPDHDHDDASSPAPATATAAALPPMIPACDPHDGPAC <u>ELIEVLITR</u> AAAVQRRVLAELVLANMTGTDLRRFLGDEVVAAAGCEDELAAAFKERVVVEEIVDVRPHERIANGAPS | 125 |
| TLD2     | MTSSTSENAPDHDHDDASSPAPATATAAALPPMIPACDPHDGPAC <u>ELIEVLITR</u> AAAVQRRVLAELVLANMTGTDLRRFLGDEVVAAAGCEDELAAAFKERVVVEEIVDVRPHERIANGAPS | 125 |
| AtGH3.3  | MILSSYITIDELTSSGTSAGEKRLMFTIEEELDRSLLSLLMFMMDQVWGLDCKGMLFLFKSESKTPGGLPARPVLTSYYSSEDFKRMFPDPVWVYTSNEALLGPDSSQSHYICMLCGLL             | 218 |
| AtGH3.6  | QVLCMNIISDELSSGTSAGEKRLMFTIEEELDRSLLSLLMFMMDQVWGLDCKGMLFLFKSESKTPGGLPARPVLTSYYSSEDFKRMFPDPVWVYTSNEALLGPDSSQSHYICMLCGLL              | 220 |
| AtGH3.5  | PILSSKIDDELSSGTSAGEKRLMFTIEEELDRSLLSLLMFMMDQVWGLDCKGMLFLFKSESKTPGGLPARPVLTSYYSSEDFKRMFPDPVWVYTSNEALLGPDSSQSHYICMLCGLL               | 220 |
| AtGH3.2  | PILSSSHITDELSSGTSAGEKRLMFTIEEELDRSLLSLLMFMMDQVWGLDCKGMLFLFKSESKTPGGLPARPVLTSYYSSEDFKRMFPDPVWVYTSNEALLGPDSSQSHYICMLCGLL              | 219 |
| AtGH3.17 | DIVSAQITIDELTSSGTSAGEKRLMFTIEEELDRSLLSLLMFMMDQVWGLDCKGMLFLFKSESKTPGGLPARPVLTSYYSSEDFKRMFPDPVWVYTSNEALLGPDSSQSHYICMLCGLL             | 210 |
| OsGH3.1  | PIFSGKIDDELSSGTSAGEKRLMFTIEEELDRSLLSLLMFMMDQVWGLDCKGMLFLFKSESKTPGGLPARPVLTSYYSSEDFKRMFPDPVWVYTSNEALLGPDSSQSHYICMLCGLL               | 220 |
| OsGH3.8  | PILSITHTVDELSSGTSAGEKRLMFTIEEELDRSLLSLLMFMMDQVWGLDCKGMLFLFKSESKTPGGLPARPVLTSYYSSEDFKRMFPDPVWVYTSNEALLGPDSSQSHYICMLCGLL              | 225 |
| TLD1     | SLISSKIDDELSSGTSAGEKRLMFTIEEELDRSLLSLLMFMMDQVWGLDCKGMLFLFKSESKTPGGLPARPVLTSYYSSEDFKRMFPDPVWVYTSNEALLGPDSSQSHYICMLCGLL               | 250 |
| TLD2     | SLISSKIDDELSSGTSAGEKRLMFTIEEELDRSLLSLLMFMMDQVWGLDCKGMLFLFKSESKTPGGLPARPVLTSYYSSEDFKRMFPDPVWVYTSNEALLGPDSSQSHYICMLCGLL               | 250 |
|          | <b>Motif I</b>                                                                                                                      |     |
| AtGH3.3  | MRHFVLRGAVFASGLRAIRGLQTNKKEADDISTG.TLSSRIIDPAIKESMSKILTK.PDOPADPITSVGQDNSEEGHILTRINENKLVIVITGAMAOYIPPLEYVSGGLPMAGTHYASS             | 341 |
| AtGH3.6  | QHKVLRGAVFASGFRARIRGLEKHWELARIDRTG.TLSSRIIDPSVREAVGETUK..PDPADPITSVGQDNSEEGHILTRINENKLVIVITGAMAOYIPPLEYVSGGLPMAGTHYASS              | 341 |
| AtGH3.5  | QKQVLRGAVFASGFRARIRGLEKHWELARIDRTG.TLSSRIIDPSVREAVAKTK..PDPADPITSVGQDNSEEGHILTRINENKLVIVITGAMAOYIPPLEYVSGGLPMAGTHYASS               | 341 |
| AtGH3.2  | MRHFVLRGAVFASGLRAIRGLQTNKKEADDISTG.TLSSRIIDPAIKESMSKILTK.PDOPADPITSVGQDNSEEGHILTRINENKLVIVITGAMAOYIPPLEYVSGGLPMAGTHYASS             | 341 |
| AtGH3.17 | QRSHVLRGAVFASGLRAIRGLEKHWELARIDRTG.TVTSWITDSSCRDVLSTLNG.PQGEADEIEESEAKRS.EGQILRRIRURKRTIDVIVITGAMAOYIPPLEYVSGGLPMAGTHYASS           | 332 |
| OsGH3.1  | HRADVLRGAVFASGLRAIRGLEKHWELARIDRTG.ELDPEIDRVVRDAGRVLR..ADPALADEIEESEAKRS.EGQILRRIRURKRTIDVIVITGAMAOYIPPLEYVSGGLPMAGTHYASS           | 341 |
| OsGH3.8  | QRNVLRGAVFASGLRAIRGLQTNKKEADDISTG.ELTPRVTDPSVREAVAAIIL..PDPADPITSVGQDNSEEGHILTRINENKLVIVITGAMAOYIPPLEYVSGGLPMAGTHYASS               | 346 |
| TLD1     | RRGVLRGAVFASGFRARIRGLEKHWELARIDRTG.DAACRGAVDAVLAARADPDLADATAAEGGAS.MRGIVRRLURRRTIDVIVITGAMAOYIPPLEYVSGGLPMAGTHYASS                  | 374 |
| TLD2     | RRGVLRGAVFASGFRARIRGLEKHWELARIDRTG.DAACRGAVDAVLAARADPDLADATAAEGGAS.MRGIVRRLURRRTIDVIVITGAMAOYIPPLEYVSGGLPMAGTHYASS                  | 374 |
|          | <b>Motif II</b>                                                                                                                     |     |
| AtGH3.3  | ESYFGNLRPLDPCPSESVYTLIPMAYEELPHE.....HEVPTKSELVLLADVEVKELELVITTYAGLNRYRVGILQVTFGYNAPQFVKFRRKRVLLSIESDKTDEAE                         | 448 |
| AtGH3.6  | EQYFGNLRPLDPCPSESVYTLIPMAYEELPHE.....SLPKALTEKEQQLDDVDVVKLQEVLDVVITTYAGLYRYRVGVVLSVAGFRMNAPOFSFCRKNVLLSIDSDKTDEVE                   | 462 |
| AtGH3.5  | EQYFGNLRPLDPCPSESVYTLIPMAYEELPHE.....NLPKALTEKEQQLDDVDVVKLQEVLDVVITTYAGLYRYRVGVVLSVAGFRMNAPOFSFCRKNVLLSIDSDKTDEVE                   | 462 |
| AtGH3.2  | ESYFGNLRPLDPCPSESVYTLIPMAYEELPHE.....AEASLDESLVLLADVEVKELELVITTYAGLYRYRVGILQVTFGYNAPQFVKFRRKRVLLSIESDKTDEAE                         | 455 |
| AtGH3.17 | EQYFGNLRPLDPCPSESVYTLIPMAYEELPHE.....ATAEASHRDLDVVDVVKLQEVLDVVITTYAGLYRYRVGVVLSVAGFRMNAPOFSFCRKNVLLSIDSDKTDEVE                      | 457 |
| OsGH3.1  | EQYFGNLRPLDPCPSESVYTLIPMAYEELPHE.....AASGDATOLDDVLRVGEVRETELVITTYAGLNRYRVGVVLSVAGFRMNAPOFSFCRKNVLLSIDSDKTDEAE                       | 456 |
| OsGH3.8  | ESYFGNLRPLDPCPSESVYTLIPMAYEELPHE.....DGDGKVRDGEVDDVGEVEGAYTELVITTYAGLYRYRVGILQVTFGYNAPQFVKFRRKRVLLSIESDKTDEAE                       | 485 |
| TLD1     | ESYFGNLRPLDPCPSESVYTLIPMAYEELPHE.....DGDGKVRDGEVDDVGEVEGAYTELVITTYAGLYRYRVGILQVTFGYNAPQFVKFRRKRVLLSIESDKTDEAE                       | 485 |
| TLD2     | ESYFGNLRPLDPCPSESVYTLIPMAYEELPHE.....DGDGKVRDGEVDDVGEVEGAYTELVITTYAGLYRYRVGILQVTFGYNAPQFVKFRRKRVLLSIESDKTDEAE                       | 469 |
|          | <b>Motif III</b>                                                                                                                    |     |
| AtGH3.3  | LQSAVENASL..LLGEGQTRVIEYTSYAEKTIIPGHYVLYWELLVKDQTNPPN.DEVMA.....RCCLMEESLNSVYRQSVADKSIGPLEIRVVNKGTFEELMDYAIRGSA                     | 553 |
| AtGH3.6  | LQNAVKNVAT..HLVFPDASLSEYTSYADTSSIPGHYVLYWELCLNG..NTPIPPSVFE.....DCLTIEESLNSVYRQSVADKSIGPLEIRVVNKGTFEELMDYAIRGSA                     | 566 |
| AtGH3.5  | LQNAVKNVAT..HLVFPDASLSEYTSYADTSSIPGHYVLYWELCLDG..NTPIPPSVFE.....DCLAVEESLNSVYRQSVADKSIGPLEIRVVNKGTFEELMDYAIRGSA                     | 566 |
| AtGH3.2  | LQSAVENASR..HLFAEQGTRVIEYTSYAEKTIIPGHYVLYWELLGQNSALMSEVEMA.....RCCLMEESLNSVYRQSVADKSIGPLEIRVVNKGTFEELMDYAIRGSA                      | 561 |
| AtGH3.17 | LLNAVTOAKMLHMQHPSLLLTYEYTSYADTSSIPGHYVLYWELPKRHSNDPKLDDKT.....MEDCCSEVEDCLDLYVVRCKRNRDKSIGPLEIRVVNKGTFEELMDYAIRGSA                  | 566 |
| OsGH3.1  | LHAVSGAVQ..HLAPFGASLVEYTSYADAATIPGHYVLYWELIRAGS...TVAPSAVFE.....ECCLSVREALNSVYRQSVADKSIGPLEIRVVNKGTFEELMDYAIRGSA                    | 555 |
| OsGH3.8  | LQRAVERASA..LLRPHGASVVEYTSYAEKTIIPGHYVLYWELTKGAGATVVDADTLG.....RCCLMEESLNSVYRQSVADKSIGPLEIRVVNKGTFEELMDYAIRGSA                      | 562 |
| TLD1     | LLRAVTAARP..LLDPLSCVLAETAYADTSSIPGHYVLYWELTPSPSPPPPCHDDADDAADGEGDKKHVHVMAACAAVEAGLDSVTRCRSRDRSIGPLEIRVVNKGTFEELMDYAIRGSA            | 608 |
| TLD2     | LLRAVTAARP..LLDPLSCVLAETAYADTSSIPGHYVLYWELTPSPSPPPPCHDDADDAADGEGDKKHVHVMAACAAVEAGLDSVTRCRSRDRSIGPLEIRVVNKGTFEELMDYAIRGSA            | 469 |
| AtGH3.3  | SINQYKTPRCVVSFTPEMELLSRVVSTHFSPALPHVSPERRR.....                                                                                     | 595 |
| AtGH3.6  | SINQYKTPRCVVFAPITIELLSRVVDSYFSPKCPKVSFGHKQWGSN.....                                                                                 | 612 |
| AtGH3.5  | SINQYKTPRCVVFAPITIELLSRVVDSYFSPKCPKVSFGHKQWGSN.....                                                                                 | 612 |
| AtGH3.2  | SINQYKTPRCVVSFTPEMELLSRVVSAHFSPALPHVSPERRR.....                                                                                     | 603 |
| AtGH3.17 | SINQYKTPRCVKSQGALEILDSRVVIGRFSSKRVPOWEPLGLDLS.....                                                                                  | 609 |
| OsGH3.1  | SINQYKAPRCVVRPQVVELLDARVQVQKYSFKPCPKVSPGNQKNKSRLVGGKD.....                                                                          | 609 |
| OsGH3.8  | SINQYKTPRCVFTPRIVELLSRVVSSHFSPALPHVTPARRSE.....                                                                                     | 605 |
| TLD1     | SVNQYKTPRCIKHPDAIVLEQRVVGRFSDAVPHHEPLKVDGAAAPATGSDC.....                                                                            | 662 |
| TLD2     | SVNQYKTPRCIKHPDAIVLEQRVVGRFSDAVPHHEPLKVDGAAAPATGSDC.....                                                                            | 469 |

**Supplemental Figure S4 Alignment of the deduced primary sequences of TLD1 and TLD2, together with members of the GH3 families in rice (*Oryza sativa*) and *Arabidopsis*.** The gene accession numbers for each homolog are as follows: AtGH3.3 (At2g23170), AtGH3.6 (At5g54510), AtGH3.5 (At4g27260), AtGH3.2 (At4g37390), AtGH3.17 (At1g28130), OsGH3.1 (Os01g57610), and OsGH3.8 (Os07g40290). Three conserved motifs are underlined.

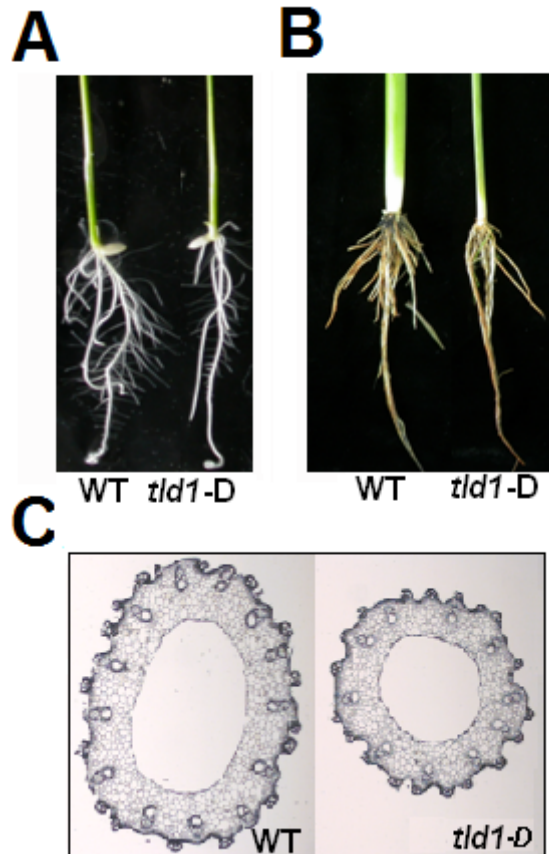

**Supplemental Figure S5 Comparison of culm and root from WT and *tld1-D* plants.**

One-week-old *tld1-D* seedlings grown on 0.5X MS agar medium (A) and soil-grown *tld1-D* plants at the tillering stage (B) display fewer lateral roots and adventitious roots compared to WT seedlings. (C) Comparison of culm cross-sections prepared in (B).



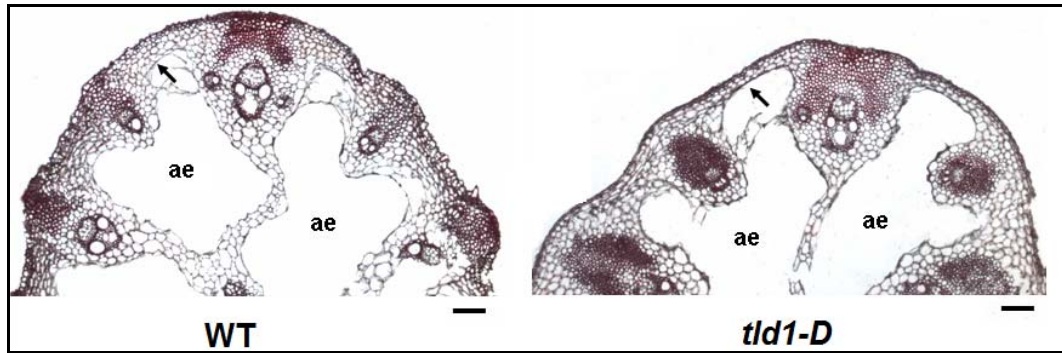

**Supplemental Figure S6 Comparison of the lamina joint in cross-section between WT and *tld1-D*.** The reduced sclerenchymatous cell layers in *tld1-D* (arrow) are shown. ae: lysigenous aerenchyma. Bar, 10  $\mu$ m.

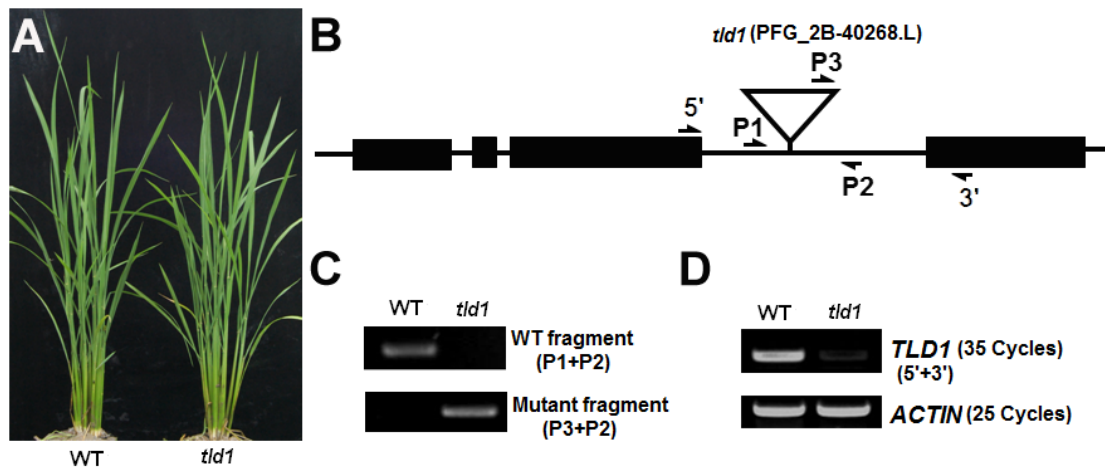

**Supplemental Figure S 7 Characterization of *TLD1* loss-of-function mutant.**

(A) No obvious difference between the wild-type (*Hwayoung*, left) *tld1* mutant (right) at tillering stage. *tld1* (PFG\_2B-40268.L) is in *Hwayoung* background. (B) Schematic representation of the T-DNA insertion site of *tld1*. P1, P2, and P3 are primers used for DNA identification, 5' and 3' are primers used for RNA identification (for primer sequence see Supplemental Table S5). (C) Genotyping of *tld1* homozygous. (D) Identification of *TLD1* transcripts in *tld1* mutant by RT-PCR, RNA was isolated from roots of WT and *tld1* homozygous. *OsACTIN* was used as an internal control.

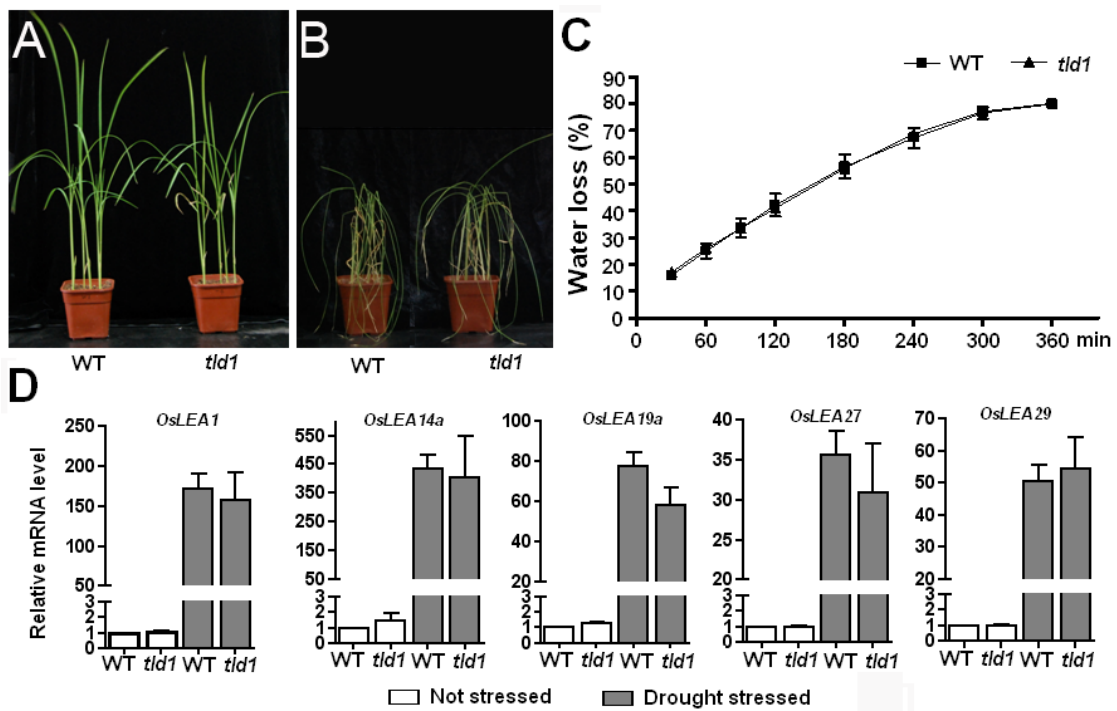

**Supplemental Figure S 8 No difference between WT and *tld1* under drought stress.** Three-week-old WT and *tld1* seedlings were grown in soil before (A) and after (B) drought stress for 7 days. (C) Water loss from three-week-old *tld1* and WT seedlings. (D) *LEA* expression in WT and *tld1* mutant before and after 6 hours drought stress by qRT-PCR.



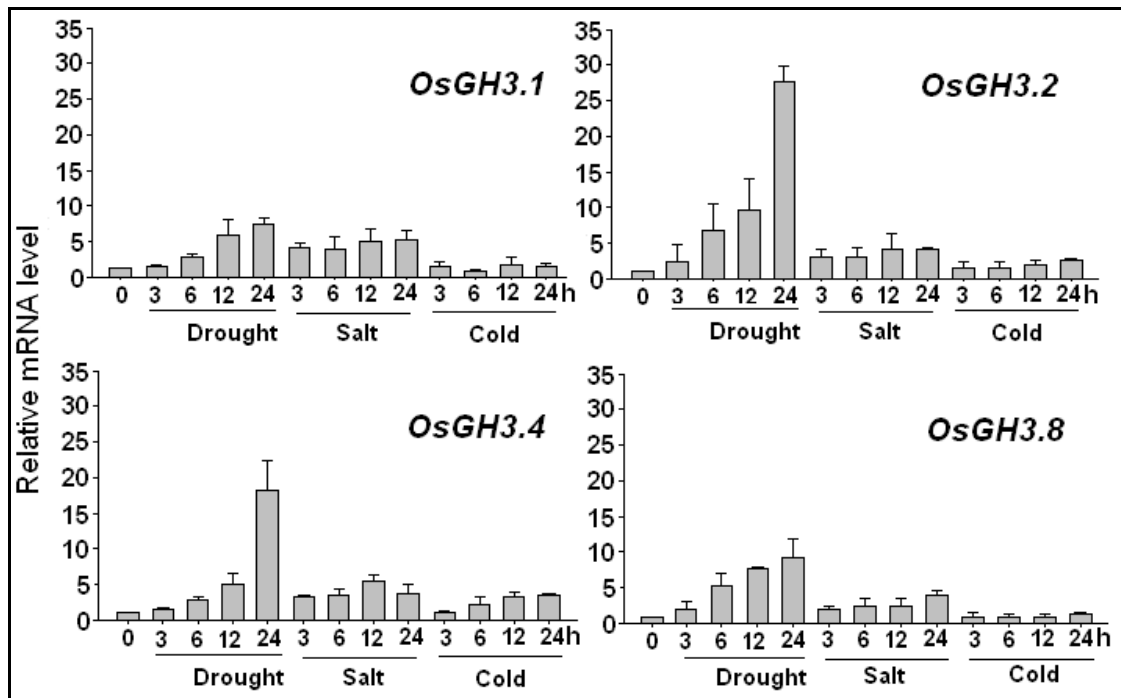

**Supplemental Figure S9** Differential expression of several *OsGH3* members under salt, cold, and drought stress. Total RNA was extracted from 14-day-old WT rice seedlings; the fold-changes in mRNA expression were determined by qRT-PCR.

## 2. Supplemental Tables

**Supplemental Table S1 Optimal parameters for the MRM detection of plant hormones by LC-MS/MS.**

| <b>Compound</b>          | <b>Transition (<i>m/z</i>)</b> | <b>Retention time (min)</b> | <b>Collision energy (eV)</b> |
|--------------------------|--------------------------------|-----------------------------|------------------------------|
| <b>IAA</b>               | 176.00/130.47                  | 6.15                        | 13                           |
| <b>D<sub>2</sub>-IAA</b> | 182.05/135.92                  | 6.15                        | 18                           |
| <b>IAA-Ala</b>           | 247.09/130.17                  | 5.70                        | 29                           |
| <b>IAA-Asp</b>           | 291.10/130.10                  | 4.99                        | 30                           |
| <b>IAA-Leu</b>           | 289.10/130.10                  | 7.53                        | 30                           |
| <b>IAA-Phe</b>           | 323.14/130.86                  | 7.60                        | 33                           |
| <b>IAA-Glu</b>           | 305.10/130.10                  | 4.96                        | 32                           |
| <b>ABA</b>               | 263.08/153.06                  | 6.81                        | 14                           |

**Supplemental Table S2 Primers used for gene cloning.**

| <b>Primer name</b>                                                                                                                | <b>5'→3'</b>                  |
|-----------------------------------------------------------------------------------------------------------------------------------|-------------------------------|
| <b>TLD1 promoter-F</b>                                                                                                            | gtcgacGAAGCTAGTAGAGAAATGCTAG  |
| <b>TLD1 promoter-R</b>                                                                                                            | gaattcGTTAGATGATCCATGCATGCATG |
| Used to clone the <i>TLD1</i> promoter                                                                                            |                               |
| <b>TLD1-FL-F/P1f</b>                                                                                                              | tctagaAATGACGTCCACGTCGTCTG    |
| <b>TLD1-FL-R/P1r</b>                                                                                                              | ggatccCTGGTCGCTGCCGGTGCC      |
| <b>TLD2-FL-R/P2r</b>                                                                                                              | ggatccGCCGTTGATTTTGCGATCGG    |
| TLD1-FL-F/P1f and TLD1-FL-R/P1r were used to clone <i>TLD1</i> . TLD1-FL-F/P1f and TLD2-FL-R/P2r were used to clone <i>TLD2</i> . |                               |
| <b>GST-TLD1,2-F</b>                                                                                                               | cgggatccATGACGTCCACGTCGTCTG   |
| <b>GST-TLD1-R</b>                                                                                                                 | cggaattcCTGGTCGCTGCCGGTGCC    |
| <b>GST-TLD2-R</b>                                                                                                                 | cggaattcGCCGTTGATTTTGCGATCG   |
| Used for expression of TLD1 and TLD2                                                                                              |                               |

**Supplemental Table S3 Primers used for the RT-PCR.**

| <b>Gene name</b>  | <b>Primer name</b> | <b>5'→3'</b>                |
|-------------------|--------------------|-----------------------------|
| <b>Os11g32510</b> | RT-Os11g32510-F    | GGTTGTACCGGTACAGGGTG        |
|                   | RT-Os11g32510-R    | GTGTGCCACCTTGTCCTTGTC       |
| <b>Os11g32520</b> | RT-Os11g32520-F    | AATGACGTCCACGTCGTCTG        |
|                   | RT-Os11g32520-R    | GCCGTTGATTTTGCGATCGG        |
| <b>Os11g32530</b> | RT-Os11g32530-F    | ATGCCAACTCATCACCTTAC        |
|                   | RT-Os11g32530-R    | TTACGCATCGCGCTGACG          |
| <b>Os11g32540</b> | RT-Os11g32540-F    | TTCAGTGCAGCGCACGTGAT        |
|                   | RT-Os11g32540-R    | AGTAACATCGTCTCGATGGAG       |
| <b>ACTIN</b>      | RT-ACTIN-F         | CCTCGTCTCGACCTTGCTGGG       |
|                   | RT-ACTIN-R         | GAGAACAAGCAGGAGGACGGC       |
| <b>18S</b>        | RT-18S-F           | CCACAT CCA AGG AAG GCA GC   |
|                   | RT-18S-R           | CAC CAG ACT TGC CCT CCA ATG |

**Supplemental Table S4 Primers used for qRT-PCR.**

| Gene name<br>(Accession No) | Primer name  | 5'→3'                         |
|-----------------------------|--------------|-------------------------------|
| <b>TLD1/OsGH3.13</b>        | q TLD1-F     | TGTGTAATGTCAAACGTTGCTCAT      |
|                             | q TLD1-R     | TGATTCATAAAGAACACTGCTCGTATT   |
| <b>OsGH3.1</b>              | q-GH3.1-F    | CGGGAACAAGCAATGGAACA          |
|                             | q-GH3.1-R    | CAGATCATCACCCCTCTAGCTTCAA     |
| <b>OsGH3.2</b>              | q-GH3.2-F    | TCATGCCCGTCATGAACTTG          |
|                             | q-GH3.2-R    | TCGTCTCCGACTTGATGAACAG        |
| <b>OsGH3.4</b>              | q-GH3.4-F    | CGCCTCCTCCGAGTGCTA            |
|                             | q-GH3.4-R    | ACATTGTTGGGATGAGGGTGTAG       |
| <b>OsGH3.8</b>              | q-GH3.8-F    | TTGGACCGTGTCCAAGAATCT         |
|                             | q-GH3.8-R    | TCTTGCCACTAACTGACAGAGTTGA     |
| <b>OsIAA1</b>               | q-IAA1-F     | GCCGCTCAATGAGGCATT            |
|                             | q-IAA1-R     | GCTTCCACTTTCTTTCAATCCAA       |
| <b>OsIAA9</b>               | q-IAA9-F     | AAGAAAATGGCCAATGATGATCA       |
|                             | q-IAA9-R     | CCCATCACCATCCTCGTAGGT         |
| <b>OsIAA20</b>              | q-IAA20-F    | TTGTACGTGAACGGGATTATTTTG      |
|                             | q-IAA20-R    | CATGCTTATGAAATTGCTGAAACA      |
| <b>OsLEA14a</b>             | q-OsLEA14a-F | TCGGGATGTCAGGCGATAA           |
|                             | q-OsLEA14a-R | GCTTGTAGGTGCTGGTGTCTT         |
| <b>OsLEA1</b>               | q-OsLEA1-F   | GTCGCAAGTCGAAGCACAAA          |
|                             | q-OsLEA1-R   | TGCGTTGCGTATCAGTGTGA          |
| <b>OsLEA19a</b>             | q-OsLEA19a-F | TGTTTTTGTGTCTTTTTGAGTCTGT     |
|                             | q-OsLEA19a-R | CCACACCCGTCAGAAATCCT          |
| <b>OsLEA8a</b>              | q-OsLEA8a-F  | GCTTGATGGACAAGGCGAAA          |
|                             | q-OsLEA8a-R  | GGCTCATCCCCTTGAACGA           |
| <b>OsLEA18</b>              | q-OsLEA18-F  | CGGTTTCAGTTCTTTTGGTTGAAT      |
|                             | q-OsLEA18-R  | AAGTTCCTTTCCATTACAGTTACAGTCTT |
| <b>OsLEA27</b>              | q-OsLEA27-F  | CCCGGCCAGCACTAAATAAG          |
|                             | q-OsLEA27-R  | AAACTGCACGTACATCACGACAT       |
| <b>OsLEA28</b>              | q-OsLEA28-F  | GTGTATAGCGTCCTCGAAGAGAATAGT   |
|                             | q-OsLEA28-R  | CACAAGCTATAGGTACAACCCAACA     |
| <b>OsLEA29</b>              | q-OsLEA29-F  | CGAGCGCAATAAAAGGAAAAA         |
|                             | q-OsLEA29-R  | AGACACGGTCCGTAAGGAGAA         |
| <b>OsLEA23</b>              | q-OsLEA23-F  | ACAAGAGCAGCGCTTAATTGG         |
|                             | q-OsLEA23-R  | GCTGCAGTGCAGAAAAAGCA          |
| <b>OsLEA24</b>              | q-OsLEA24-F  | ATGCAGTGATCTGTCTCATGCAT       |
|                             | q-OsLEA24-R  | GCACCGTGCAGCCATTATTA          |
| <b>OsACTIN 1</b>            | q-ACTIN-F    | TGGCATCTCTCAGCACATTCC         |
|                             | q-ACTIN-R    | TGCACAATGGATGGGTCAGA          |

**Supplemental Table S5 Primers used for *tld1* identification**

| <b>Primer name</b>       | <b>5'→3'</b>            |
|--------------------------|-------------------------|
| <b>tld1-K.out-P1</b>     | AGCTAACTGCAAGTCGATTGG   |
| <b>tld1-K.out-P3</b>     | CTTCCTTCATTTTACAATGTAAG |
| <b>tld1-K.out-P2</b>     | GTAGGGAATCCCAAGCTATAAC  |
| DNA level identification |                         |
| <b>TLD1-RNA-5'</b>       | TCGTCGTCACCACCTTCACAG   |
| <b>TLD1-RNA-3'</b>       | GTGTGCCACCTTGTCCTTGT    |
| RNA level identification |                         |



### 3. Supplemental Methods

#### Quantification of IAA, its conjugates, and ABA by LC-MS/MS

The mobile phase was composed of 0.1% acetic acid in deionized water as solvent A and methanol as solvent B. A linear gradient was run at 200  $\mu\text{L}/\text{min}$ , consisting of 20% solvent B at the start ( $t=0$  min), increased to 90% solvent B at  $t=6$  min, and then held at 90% solvent B for 2 min until  $t=8$  min. The gradient was then returned to 20% solvent B at  $t=8.1$  min, and stabilized at 20% solvent B for 1.9 min until  $t=10$  min before the next injection. The atmospheric pressure ionization (API) source was operated in positive ESI mode. The TSQ quantum mass spectrometer was calibrated with a solution of polytyrosine-1, 3, 6 according to the manufacturer's instructions. The ESI source parameters were optimized for IAA at an LC flow of 200  $\mu\text{L}/\text{min}$  based on preliminary results indicating that IAA was the analyte for which the method had the lowest sensitivity. The optimized source parameters were as follows: sheath gas pressure, 20 (arbitrary units); auxiliary gas flow, 30 (arbitrary units); spray voltage, 4,000 V; capillary temperature, 350  $^{\circ}\text{C}$ ; and skimmer offset, 10 V. For quantification, the mass spectrometer was set to the data acquisition mode of multiple-reaction monitoring (MRM); the specified acquisition parameters are shown in Supplemental Table 1. Detection of the compounds was performed in the MRM mode with a single time segment containing seven events. The acquisition parameters common to all analytes were: scan width ( $m/z$ ), 0.10; scan time, 0.05 s; peak width (FWHM), 0.4 for Q1 and 0.7 for Q3; and collision gas pressure, 1.5 mTorr. Data acquisition and analysis were accomplished with Xcalibur software v.1.4 (Thermo, San Jose, CA, USA).
